# Supplementary material
Source: HighWire-hosted journal article supplement (https://bmjopen.bmj.com/content/9/11/e030405)
Supplement: inline-supplementary-material-1 [file inline-supplementary-material-1.pdf]

**Supplementary File 1. Search terms****Search terms**

(Adrenergic alpha blockers [MeSH] OR Adrenergic alpha blockers OR alpha blockers OR doxazosin OR terazosin OR silodosin OR tamsulosin OR alfuzosin) AND (LUTS [MeSH] OR Prostatic Hyperplasia [MeSH] OR LUTS OR BPH OR lower urinary tract symptoms OR benign prostate hypertrophy OR benign prostate enlargement) AND (discontin\* OR interrup\* OR cessa\* OR stop\* OR withdra\* OR intermit\*).

## Supplementary File 2. Flow diagram of inclusion and exclusion of studies

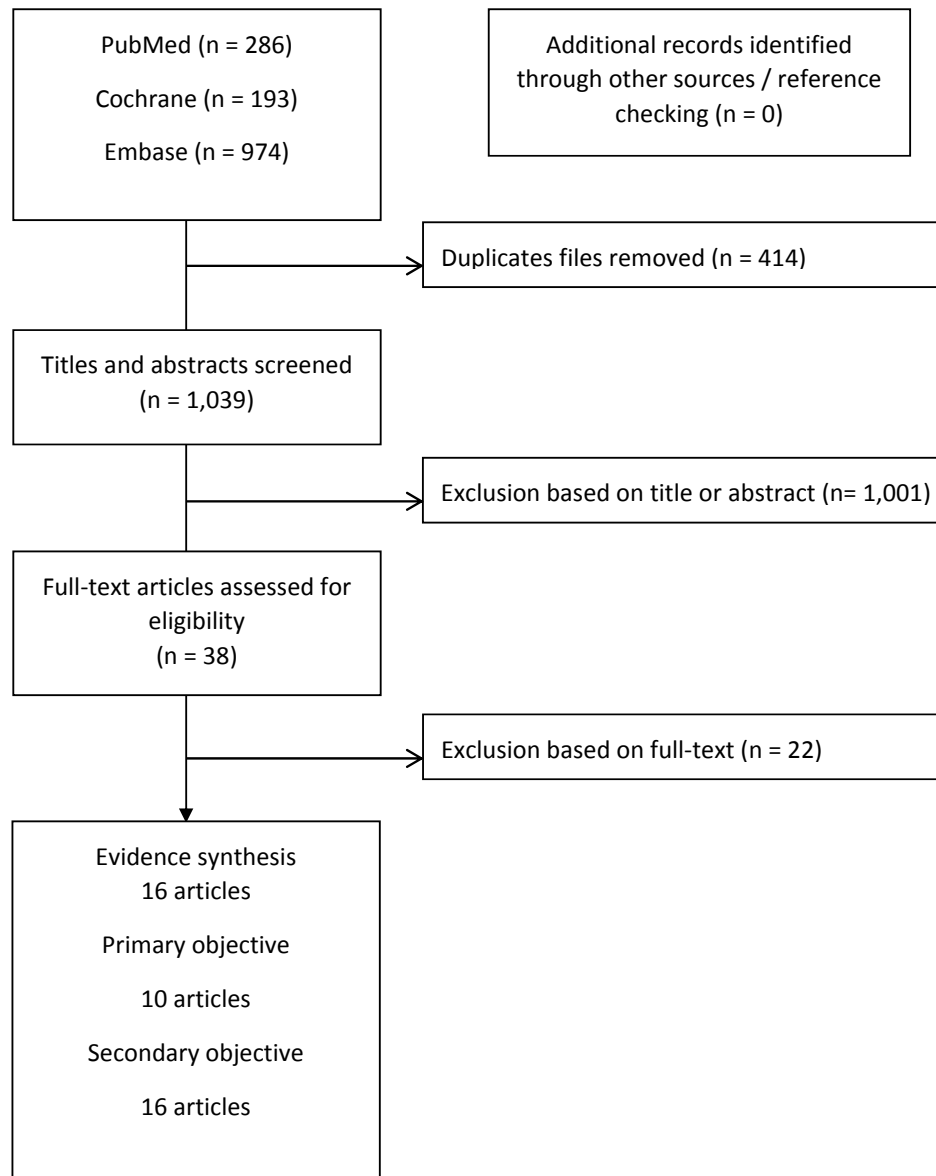

**Supplementary File 3. Imputation of SD data from a previous meta-analysis**

| Tool         | Ref.                  | Main author     | Groups        | N   | SD  | Pooled SD by study | Pooled SD overall |
|--------------|-----------------------|-----------------|---------------|-----|-----|--------------------|-------------------|
| <b>IPSS</b>  | <b>N = 12 studies</b> |                 |               |     |     |                    |                   |
|              | 49                    | Chapple         | no data       |     |     |                    |                   |
|              | 73                    | Djavan          | no data       |     |     |                    |                   |
|              | 147                   | Kirby           | 1             | 250 | 5.8 | 6.3                |                   |
|              |                       |                 | 2             | 239 | 6.2 |                    |                   |
|              |                       |                 | 3             | 265 | 6.2 |                    |                   |
|              |                       |                 | 4             | 253 | 6.9 |                    |                   |
|              | 160                   | Lepor           | no data       |     |     |                    |                   |
|              | 163                   | Lepor           | no data       |     |     |                    |                   |
|              | 191                   | McConnell       | no data       |     |     |                    |                   |
|              | 201                   | Mohanty         | placebo       | 33  | 4   | 4.2                |                   |
|              |                       |                 | AB            | 36  | 4.4 |                    |                   |
|              | 208                   | Narayan         | no data       |     |     |                    |                   |
|              | 254                   | Roehrborn       | no data       |     |     |                    |                   |
|              | 255                   | Roehrborn       | no data       |     |     |                    |                   |
|              | 262                   | Roehrborn       | no data       |     |     |                    |                   |
|              | 305                   | van Kerrebroeck | N/A           |     |     |                    |                   |
|              |                       |                 |               |     |     |                    | <b>6.2</b>        |
| <b>Q-max</b> | <b>N = 21 studies</b> |                 |               |     |     |                    |                   |
|              | 6                     | Abrams          | N/A           |     |     |                    |                   |
|              | 33                    | Brawer          | no data       |     |     |                    |                   |
|              | 50                    | chapple         | no data       |     |     |                    |                   |
|              | 51                    | chapple         | meta-analysis |     |     |                    |                   |
|              | 53                    | christensen     | N/A           |     |     |                    |                   |
|              | 79                    | elhilali        | no data       |     |     |                    |                   |
|              | 101                   | gillenwater     | no data       |     |     |                    |                   |
|              | 138                   | Kawabe          | N/A           |     |     |                    |                   |
|              | 147                   | kirby           | 1             | 250 | 4.9 | 4.7                |                   |
|              |                       |                 | 2             | 239 | 4.7 |                    |                   |
|              |                       |                 | 3             | 265 | 5.1 |                    |                   |
|              |                       |                 | 4             | 253 | 4.2 |                    |                   |
|              | 160                   | Lepor           | no data       |     |     |                    |                   |
|              | 161                   | Lepor           | no data       |     |     |                    |                   |
|              | 163                   | Lepor           | no data       |     |     |                    |                   |
|              | 169                   | Lloyd           | 1             | 20  | 3.6 | 3.5                |                   |
|              |                       |                 | 2             | 19  | 3.5 |                    |                   |
|              |                       |                 | 3             | 19  | 3.9 |                    |                   |
|              |                       |                 | 4             | 22  | 2.8 |                    |                   |
|              | 184                   | Martorana       | N/A           |     |     |                    |                   |
|              | 201                   | Mohanty         | placebo       | 33  | 2.6 | 3.8                |                   |
|              |                       |                 | AB            | 36  | 4.6 |                    |                   |

|     |                    |         |
|-----|--------------------|---------|
| 208 | Narayan            | no data |
| 254 | Roehrborn          | no data |
| 255 | Roehrborn          | no data |
| 262 | Roehrborn          | no data |
| 269 | Schulman           | N/A     |
| 305 | van<br>Kerrebroeck | N/A     |

4.6

| QoL | N = 5              |           |     |     |     |  |
|-----|--------------------|-----------|-----|-----|-----|--|
| 49  | chapple            | placebo   | 350 | 1   |     |  |
|     |                    | ocas 0.4  | 354 | 1.1 | 1.1 |  |
|     |                    | mr 0.4    | 699 | 1.1 |     |  |
|     |                    | ocas 0.8  | 706 | 1.1 |     |  |
| 160 | Lepor              | no data   |     |     |     |  |
| 254 | Roehrborn          | no data   |     |     |     |  |
| 255 | Roehrborn          | placebo   | 763 | 1.1 |     |  |
|     |                    | alfuzosin | 759 | 1.1 | 1.1 |  |
| 305 | van<br>Kerrebroeck | N/A       |     |     |     |  |

1.1

In total, 12 studies assessed the IPSS, 21 assessed Q-max, and 5 assessed the IPSS QoL domain. Only studies that reported an SD at follow-up were included for the IPSS and Q-max data. No follow-up SDs were available for the QoL data, so baseline SDs were used. The SDs were imputed based on Table 6-35 from the NICE guideline on the management of LUTS [ref. 3].

*Abbreviations:* IPSS, International Prostate Symptom Score; N/A, article not accessible; Q-max, Peak urine flow rate; QoL, Quality of life; SD, standard deviation.

## Supplementary File 4. Results of the risk of bias assessment

|                | Random sequence generation (selection bias) | Allocation concealment (selection bias) | Blinding of participants and personnel (performance bias) | Blinding of outcome assessment (detection bias) | Incomplete outcome data (attrition bias) | Selective reporting (reporting bias) | Other bias |
|----------------|---------------------------------------------|-----------------------------------------|-----------------------------------------------------------|-------------------------------------------------|------------------------------------------|--------------------------------------|------------|
| Barkin et al   | ?                                           | ?                                       | +                                                         | +                                               | +                                        | +                                    | +          |
| Debruyne et al | +                                           | +                                       | +                                                         | +                                               | +                                        | +                                    | +          |
| Fabricius      | ?                                           | ?                                       | +                                                         | +                                               | +                                        | +                                    | +          |
| Gerber et al   | -                                           | -                                       | -                                                         | -                                               | -                                        | +                                    | +          |
| Kaplan et al   | -                                           | -                                       | -                                                         | -                                               | +                                        | +                                    | +          |
| Lee et al      | +                                           | +                                       | -                                                         | -                                               | -                                        | +                                    | +          |
| Liaw & Kuo     | -                                           | ?                                       | -                                                         | -                                               | ?                                        | +                                    | ?          |
| Lin et al      | +                                           | ?                                       | -                                                         | -                                               | +                                        | +                                    | +          |
| Matsukawa      | +                                           | +                                       | -                                                         | -                                               | +                                        | +                                    | +          |
| Yanardag et al | ?                                           | ?                                       | -                                                         | ?                                               | +                                        | +                                    | +          |
